# Supplementary material for: A reinforcement learning-based adaptive evaluation framework for personalized music education
Source: PeerJ journal article supplement (doi:10.7717/peerj-cs.3464), 2026-02-03
Supplement: Dataset_and_Implementation_Details.zip [file Dataset.xlsx]

## Sheet: Sheet1
Student ID	TP	ME	SR	IS	Avg Skill Metric (S)	LP	Step
1	67	77	70	78	73	0	Initial
1	72	80	78	79	77.25	4.25	Intervention
2	61	69	68	77	68.75	0	Initial
2	74	84	77	75	77.5	8.75	Intervention
3	60	74	71	79	71	0	Initial
3	77	77	81	82	79.25	8.25	Intervention
4	62	67	67	75	67.75	0	Initial
4	77	78	72	81	77	9.25	Intervention
5	64	75	73	71	70.75	0	Initial
5	83	72	76	79	77.5	6.75	Intervention
6	68	69	71	75	70.75	0	Initial
6	82	84	84	71	80.25	9.5	Intervention
7	63	72	65	67	66.75	0	Initial
7	80	78	75	77	77.5	10.75	Intervention
8	60	74	72	71	69.25	0	Initial
8	77	76	74	83	77.5	8.25	Intervention
9	61	66	63	76	66.5	0	Initial
9	85	72	83	83	80.75	14.25	Intervention
10	76	75	72	61	71	0	Initial
10	75	72	72	80	74.75	3.75	Intervention
11	60	70	66	67	65.75	0	Initial
11	78	75	71	80	76	10.25	Intervention
12	66	78	71	80	73.75	0	Initial
12	85	70	81	81	79.25	5.5	Intervention
13	63	61	62	63	62.25	0	Initial
13	82	73	72	78	76.25	14	Intervention
14	61	75	76	64	69	0	Initial
14	73	85	79	75	78	9	Intervention
15	62	68	80	68	69.5	0	Initial
15	77	74	79	80	77.5	8	Intervention
16	76	60	64	75	68.75	0	Initial
16	79	75	79	73	76.5	7.75	Intervention
17	64	60	72	70	66.5	0	Initial
17	76	76	71	79	75.5	9	Intervention
18	64	77	62	68	67.75	0	Initial
18	80	75	74	78	76.75	9	Intervention
19	78	62	62	69	67.75	0	Initial
19	80	74	81	85	80	12.25	Intervention
20	63	69	62	77	67.75	0	Initial
20	73	76	70	82	75.25	7.5	Intervention
21	63	76	71	79	72.25	0	Initial
21	78	83	70	83	78.5	6.25	Intervention
22	79	80	67	62	72	0	Initial
22	74	77	85	85	80.25	8.25	Intervention
23	61	62	68	69	65	0	Initial
23	80	84	80	71	78.75	13.75	Intervention
24	63	71	69	75	69.5	0	Initial
24	73	72	71	75	72.75	3.25	Intervention
25	78	75	75	66	73.5	0	Initial
25	83	81	85	78	81.75	8.25	Intervention
26	75	66	62	73	69	0	Initial
26	80	71	70	76	74.25	5.25	Intervention
27	75	62	80	64	70.25	0	Initial
27	81	77	73	78	77.25	7	Intervention
28	73	69	78	60	70	0	Initial
28	70	82	85	73	77.5	7.5	Intervention
29	65	63	71	63	65.5	0	Initial
29	81	84	75	71	77.75	12.25	Intervention
30	80	78	80	65	75.75	0	Initial
30	71	75	74	81	75.25	-0.5	Intervention
31	70	70	65	68	68.25	0	Initial
31	74	85	70	84	78.25	10	Intervention
32	60	75	61	77	68.25	0	Initial
32	72	83	81	76	78	9.75	Intervention
33	66	61	69	72	67	0	Initial
33	76	75	75	81	76.75	9.75	Intervention
34	79	65	65	67	69	0	Initial
34	77	70	77	71	73.75	4.75	Intervention
35	69	67	73	68	69.25	0	Initial
35	85	83	71	83	80.5	11.25	Intervention
36	64	64	68	63	64.75	0	Initial
36	84	70	74	70	74.5	9.75	Intervention
37	61	74	79	73	71.75	0	Initial
37	74	77	79	79	77.25	5.5	Intervention
38	78	63	76	79	74	0	Initial
38	73	80	76	81	77.5	3.5	Intervention
39	63	74	68	61	66.5	0	Initial
39	85	72	77	83	79.25	12.75	Intervention
40	65	61	73	74	68.25	0	Initial
40	70	76	76	84	76.5	8.25	Intervention
41	61	75	60	65	65.25	0	Initial
41	78	78	75	82	78.25	13	Intervention
42	61	62	74	71	67	0	Initial
42	81	75	71	81	77	10	Intervention
43	62	79	60	74	68.75	0	Initial
43	76	72	78	71	74.25	5.5	Intervention
44	66	73	70	80	72.25	0	Initial
44	85	80	83	78	81.5	9.25	Intervention
45	69	76	73	74	73	0	Initial
45	80	77	75	73	76.25	3.25	Intervention
46	66	76	72	75	72.25	0	Initial
46	76	77	82	83	79.5	7.25	Intervention
47	67	72	71	68	69.5	0	Initial
47	84	80	80	70	78.5	9	Intervention
48	68	69	68	61	66.5	0	Initial
48	78	77	83	74	78	11.5	Intervention
49	60	79	77	73	72.25	0	Initial
49	83	74	82	75	78.5	6.25	Intervention
50	71	60	75	62	67	0	Initial
50	84	80	79	77	80	13	Intervention
